# Supplementary material for: Seed Dormancy Involves a Transcriptional Program That Supports Early Plastid Functionality during Imbibition
Source: MDPI journal article supplement (doi:10.3390/plants7020035), 2018-04-19
Supplement: s1 [file s1]

## SUPPLEMENTAL TABLES

**Supplemental Table S1.** Alignment of a whole set of reads (14,326,619 from a replicate of dormant red rice seeds incubated at 30 °C for 8 d), with publicly available genome sequences of *Oryza* species.

| Species                          | Overall read mapping rate | Number of multiple alignments                              |
|----------------------------------|---------------------------|------------------------------------------------------------|
| <i>Oryza sativa ssp japonica</i> | 97.5%                     | 1,670,920 (12.0%) have multiple alignments (3202 have >20) |
| <i>Oryza rufipogon</i>           | 95.1%                     | 873,313 ( 6.4%) have multiple alignments (0 have >20)      |
| <i>Oryza sativa ssp indica</i>   | 94.6%                     | 2,097,638 (15.5%) have multiple alignments (204 have >20)  |
| <i>Oryza nivara</i>              | 93.6%                     | 954,611 ( 7.1%) have multiple alignments (0 have >20)      |
| <i>Oryza barthii</i>             | 89.8%                     | 1,081,042 ( 8.4%) have multiple alignments (0 have >20)    |
| <i>Oryza glumaepatula</i>        | 89.0%                     | 657,466 ( 5.2%) have multiple alignments (0 have >20)      |
| <i>Oryza glaberrima</i>          | 82.1%                     | 1,299,343 (11.0%) have multiple alignments (4 have >20)    |
| <i>Oryza longistaminata</i>      | 75.9%                     | 833,692 ( 7.7%) have multiple alignments (0 have >20)      |
| <i>Oryza meridionalis</i>        | 73.3%                     | 961,661 ( 9.2%) have multiple alignments (0 have >20)      |
| <i>Oryza punctata</i>            | 54.7%                     | 1,129,289 (14.4%) have multiple alignments (9 have >20)    |
| <i>Oryza brachyantha</i>         | 22.2%                     | 312,783 ( 9.8%) have multiple alignments (0 have >20)      |

**Supplemental Table S2.** Most abundant mRNAs detected in imbibed caryopses across all six tested conditions. The most relevant GO (gene ontology) terms are shown.

| Rank | Gene id.                  | Description of encoded product                                            | Gene ontology                                                                                                                                                                                                                                                                                                                            |
|------|---------------------------|---------------------------------------------------------------------------|------------------------------------------------------------------------------------------------------------------------------------------------------------------------------------------------------------------------------------------------------------------------------------------------------------------------------------------|
| 1    | OS07G0206500 <sup>1</sup> | 13 kDa prolamin                                                           | GO:0045735 nutrient reservoir activity                                                                                                                                                                                                                                                                                                   |
| 2    | OS01G0762500 <sup>1</sup> | Glutelin type-A 1 (GluA-1)                                                | GO:0045735 nutrient reservoir activity                                                                                                                                                                                                                                                                                                   |
| 3    | OS07G0206400 <sup>1</sup> | 13 kDa prolamin C                                                         | GO:0045735 nutrient reservoir activity                                                                                                                                                                                                                                                                                                   |
| 4    | OS10G0400200 <sup>1</sup> | Glutelin type-A (GluA-2)                                                  | GO:0045735 nutrient reservoir activity                                                                                                                                                                                                                                                                                                   |
| 5    | OS03G0766100 <sup>1</sup> | 10 kDa prolamin                                                           | GO:0045735 nutrient reservoir activity                                                                                                                                                                                                                                                                                                   |
| 6    | OS06G0507200 <sup>1</sup> | Prolamin                                                                  | GO:0045735 nutrient reservoir activity                                                                                                                                                                                                                                                                                                   |
| 7    | OS08G0104400 <sup>1</sup> | Putative uncharacterized protein                                          | GO:0008150 biological_process GO:0003674 molecular_function                                                                                                                                                                                                                                                                              |
| 8    | OS07G0214300 <sup>1</sup> | Seed allergenic protein RAG2 (albumin)                                    | GO:0016068 type I hypersensitivity GO:0005615 extracellular space GO:0004867 serine-type endopeptidase inhibitor activity                                                                                                                                                                                                                |
| 9    | OS07G0529800              | Protein translation factor SUI1 homolog (eIF-1)                           | GO:0006413 translational initiation GO:0003743 translation initiation factor activity GO:0006417 regulation of translation                                                                                                                                                                                                               |
| 10   | OS11G0582400 <sup>1</sup> | Antimicrobial peptide MBP-1 family                                        | GO:0050832 defence response to fungus                                                                                                                                                                                                                                                                                                    |
| 11   | OS02G0249600 <sup>1</sup> | Glutelin type B-2 (GluB-2)                                                | GO:0045735 nutrient reservoir activity                                                                                                                                                                                                                                                                                                   |
| 12   | OS05G0499100 <sup>1</sup> | 19 kDa globulin (Glb1)                                                    | GO:0045735 nutrient reservoir activity                                                                                                                                                                                                                                                                                                   |
| 13   | OS11G0703900              | DnaK-type molecular chaperone hsp70                                       | GO:0006950 response to stress GO:0005524 ATP binding                                                                                                                                                                                                                                                                                     |
| 14   | OS02G0453600 <sup>1</sup> | Glutelin (GluC)                                                           | GO:0045735 nutrient reservoir activity                                                                                                                                                                                                                                                                                                   |
| 15   | OS02G0161900              | Polyubiquitin 6                                                           | GO:0016874 ligase activity                                                                                                                                                                                                                                                                                                               |
| 16   | OS12G0269200 <sup>1</sup> | Prolamin PPROL 17D                                                        | GO:0045735 nutrient reservoir activity                                                                                                                                                                                                                                                                                                   |
| 17   | OS05G0349800              | Embryonic abundant protein 1 (Late Embryogenesis Abundant protein OsEm)   | GO:0048700 acquisition of desiccation tolerance in seed GO:0048316 seed development GO:0009737 response to abscisic acid                                                                                                                                                                                                                 |
| 18   | OS03G0793700              | Cupin family protein; globulin-like (acts as zinc metalloprotease)        | GO:0045735 nutrient reservoir activity                                                                                                                                                                                                                                                                                                   |
| 19   | OS10G0542100 <sup>1</sup> | Class II metallothionein-like protein 1A                                  | GO:0008270 zinc ion binding                                                                                                                                                                                                                                                                                                              |
| 20   | OS07G0638300              | 1-Cys peroxiredoxin A (1Cys-Prx)                                          | GO:0051920 peroxiredoxin activity GO:0016491 oxidoreductase activity                                                                                                                                                                                                                                                                     |
| 21   | OS03G0663750              | Not annotated                                                             |                                                                                                                                                                                                                                                                                                                                          |
| 22   | OS03G0670700              | Retrotransposon protein, putative, Ty1-copia subclass                     | GO:0003676 nucleic acid binding RNA secondary structure unwinding GO:0003690 double-stranded DNA binding GO:0032508 DNA duplex unwinding GO:0003697 single-stranded DNA binding GO:0006406 mRNA export from nucleus GO:0009737 response to abscisic acid GO:0016310 phosphorylation GO:0016301 kinase activity GO:0009507 chloroplast    |
| 23   | OS04G0589800              | OSJNBa0086O06.12 protein                                                  | GO:0009790 embryo development                                                                                                                                                                                                                                                                                                            |
| 24   | OS07G0213800              | Allergenic protein                                                        | GO:0016068 type I hypersensitivity GO:0005615 extracellular space GO:0004867 serine-type endopeptidase inhibitor activity                                                                                                                                                                                                                |
| 25   | OS11G0660500              | Translationally-controlled tumor protein homolog (TCTP)                   | GO:0040014 regulation of multicellular organism growth GO:0001558 regulation of cell growth GO:0048768 root hair cell tip growth GO:0009791 post-embryonic development GO:0007346 regulation of mitotic cell cycle GO:0008283 cell proliferation GO:0010252 auxin homeostasis GO:0009579 thylakoid GO:0009507 chloroplast                |
| 26   | OS05G0542500              | Late embryogenesis abundant protein, group 3 (putative dehydrin OsLEA3-1) |                                                                                                                                                                                                                                                                                                                                          |
| 27   | OS07G0214600 <sup>1</sup> | Allergen RA16                                                             | GO:0016068 type I hypersensitivity GO:0005615 extracellular space GO:0004867 serine-type endopeptidase inhibitor activity                                                                                                                                                                                                                |
| 28   | OS01G0256500              | Zinc inducible protein-like                                               | GO:0006950 response to stress                                                                                                                                                                                                                                                                                                            |
| 29   | OS11G0454300              | Water stress-inducible protein Rab21 (OsRab16A)                           | GO:0009415 response to water GO:0006950 response to stress                                                                                                                                                                                                                                                                               |
| 30   | OS07G0215500 <sup>1</sup> | Seed allergenic protein RA5                                               | GO:0016068 type I hypersensitivity GO:0005615 extracellular space GO:0004867 serine-type endopeptidase inhibitor activity                                                                                                                                                                                                                |
| 31   | OS05G0140800              | Glucose and ribitol dehydrogenase homolog                                 | GO:0016491 oxidoreductase activity                                                                                                                                                                                                                                                                                                       |
| 32   | OS04G0510900 <sup>1</sup> | Plant seed peroxygenase                                                   | GO:0071614 linoleic acid epoxygenase activity GO:0034389 lipid particle organization GO:0031407 oxylipin metabolic process GO:0004392 heme oxygenase (decyclizing) activity GO:0031969 chloroplast membrane GO:0009737 response to abscisic acid GO:0016165 linoleate 13S-lipoxygenase activity GO:0031408 oxylipin biosynthetic process |
| 33   | OS01G0705200              | WSI18 protein induced by water stress                                     |                                                                                                                                                                                                                                                                                                                                          |
| 34   | OS01G0905800              | Fructose-bisphosphate aldolase                                            | GO:0004332 fructose-bisphosphate aldolase activity                                                                                                                                                                                                                                                                                       |
| 35   | OS01G0124401 <sup>1</sup> | Bowman-Birk type bran trypsin inhibitor                                   | GO:0004867 serine-type endopeptidase inhibitor activity                                                                                                                                                                                                                                                                                  |
| 36   | OS03G0427300 <sup>1</sup> | Glutelin type-A 3 (GluA-3)                                                | GO:0045735 nutrient reservoir activity                                                                                                                                                                                                                                                                                                   |
| 37   | OS11G0211800 <sup>1</sup> |                                                                           | GO:0008200 ion channel inhibitor activity                                                                                                                                                                                                                                                                                                |
| 38   | OS02G0586900              | Putative uncharacterized protein                                          |                                                                                                                                                                                                                                                                                                                                          |
| 39   | OS02G0249000 <sup>1</sup> | Glutelin C / B-2-type (GluD-1)                                            | GO:0045735 nutrient reservoir activity                                                                                                                                                                                                                                                                                                   |
| 40   | OS05G0569500              | Putative embryo-specific protein Ose731                                   | GO:0009737 response to abscisic acid                                                                                                                                                                                                                                                                                                     |
| 41   | OS06G0612800              | Zinc finger A20 and AN1 domain-containing stress-associated protein 8     | GO:0003677 DNA binding                                                                                                                                                                                                                                                                                                                   |
| 42   | OS05G0489600              | ADP-ribosylation factor 2                                                 | GO:0007264 small GTPase mediated signal transduction GO:0005525 GTP binding GO:0006471 protein ADP-ribosylation                                                                                                                                                                                                                          |
| 43   | OS12G0464400              | Oxidoreductase, short chain dehydrogenase/reductase family protein        | GO:0016491 oxidoreductase activity                                                                                                                                                                                                                                                                                                       |

<sup>1</sup> Genes that contain the AAATAA motif in their 3’ UTR sequence.

Supplemental Table S3. Most intensely expressed genes detected in imbibed caryopses (first 12 genes for each condition).

| Condition  | Incubation temperature (°C) | Time of incubation | Most expressed transcripts |                                                                             |                                                                                                                                                                                                                                                                                                                                                                                                                                                                                                                                               |
|------------|-----------------------------|--------------------|----------------------------|-----------------------------------------------------------------------------|-----------------------------------------------------------------------------------------------------------------------------------------------------------------------------------------------------------------------------------------------------------------------------------------------------------------------------------------------------------------------------------------------------------------------------------------------------------------------------------------------------------------------------------------------|
|            |                             |                    | Gene id.                   | Description (short)                                                         | Gene ontology (short)                                                                                                                                                                                                                                                                                                                                                                                                                                                                                                                         |
| Dormant    | 30                          | 8 hours            | OS01G0762500               | Glutelin type-A 1                                                           | GO:0045735 nutrient reservoir activity                                                                                                                                                                                                                                                                                                                                                                                                                                                                                                        |
|            |                             |                    | OS07G0206500               | 13 kDa prolamin                                                             | GO:0045735 nutrient reservoir activity                                                                                                                                                                                                                                                                                                                                                                                                                                                                                                        |
|            |                             |                    | OS10G0400200               | Glutelin type-A 2                                                           | GO:0045735 nutrient reservoir activity                                                                                                                                                                                                                                                                                                                                                                                                                                                                                                        |
|            |                             |                    | OS07G0206400               | 13 kDa prolamin C                                                           | GO:0045735 nutrient reservoir activity                                                                                                                                                                                                                                                                                                                                                                                                                                                                                                        |
|            |                             |                    | OS03G0766100               | 10 kDa prolamin                                                             | GO:0045735 nutrient reservoir activity                                                                                                                                                                                                                                                                                                                                                                                                                                                                                                        |
|            |                             |                    | OS06G0507200               | Prolamin                                                                    | GO:0045735 nutrient reservoir activity                                                                                                                                                                                                                                                                                                                                                                                                                                                                                                        |
|            |                             |                    | OS07G0214300               | Seed allergenic protein RAG2                                                | GO:0016068 type I hypersensitivity GO:0005615 extracellular space GO:0004867 serine-type endopeptidase inhibitor activity                                                                                                                                                                                                                                                                                                                                                                                                                     |
|            |                             |                    | OS02G0249600               | Glutelin type-B 2                                                           | GO:0045735 nutrient reservoir activity                                                                                                                                                                                                                                                                                                                                                                                                                                                                                                        |
|            |                             |                    | OS11G0582400               | Embryo-specific protein                                                     | GO:0050832 defense response to fungus                                                                                                                                                                                                                                                                                                                                                                                                                                                                                                         |
|            |                             |                    | OS02G0453600               | Glutelin                                                                    | GO:0045735 nutrient reservoir activity                                                                                                                                                                                                                                                                                                                                                                                                                                                                                                        |
|            |                             |                    | OS05G0499100               | 19 kDa globulin                                                             | GO:0045735 nutrient reservoir activity                                                                                                                                                                                                                                                                                                                                                                                                                                                                                                        |
|            |                             |                    | OS03G0197300               | protein                                                                     | GO:0045735 nutrient reservoir activity                                                                                                                                                                                                                                                                                                                                                                                                                                                                                                        |
|            |                             | 8 days             | OS02G0161900               | Polyubiquitin 6                                                             | GO:0016874 ligase activity GO:0005737 cytoplasm                                                                                                                                                                                                                                                                                                                                                                                                                                                                                               |
|            |                             |                    | OS11G0703900               | DnaK-type molecular chaperone hsp70-rice; Heat shock cognate 70 kDa protein | GO:0006950 response to stress GO:0000166 nucleotide binding GO:0005524 ATP binding                                                                                                                                                                                                                                                                                                                                                                                                                                                            |
|            |                             |                    | OS02G0586900               | Putative uncharacterized protein                                            |                                                                                                                                                                                                                                                                                                                                                                                                                                                                                                                                               |
|            |                             |                    | OS08G0104400               | Putative uncharacterized protein                                            | GO:0008150 biological_process GO:0003674 molecular_function                                                                                                                                                                                                                                                                                                                                                                                                                                                                                   |
|            |                             |                    | OS07G0529800               | Protein translation factor SUI1 homolog                                     | GO:0006413 translational initiation GO:0003743 translation initiation factor activity GO:0006417 regulation of translation                                                                                                                                                                                                                                                                                                                                                                                                                    |
|            |                             |                    | OS11G0660500               | Translationally-controlled tumor protein homolog                            | GO:0040014 regulation of multicellular organism growth GO:0001558 regulation of cell growth GO:0009791 post-embryonic development GO:0007346 regulation of mitotic cell cycle GO:0008283 cell proliferation GO:0009790 embryo development GO:0048364 root development GO:0010252 auxin homeostasis GO:0009579 thylakoid GO:0048046 apoplast GO:0009507 chloroplast GO:0005886 plasma membrane GO:0005634 nucleus GO:0005737 cytoplasm                                                                                                         |
|            |                             |                    | OS07G0206500               | 13 kDa prolamin                                                             | GO:0045735 nutrient reservoir activity                                                                                                                                                                                                                                                                                                                                                                                                                                                                                                        |
|            |                             |                    | OS03G0670700               | Retrotransposon protein, putative, Ty1-copia subclass                       | GO:0003676 nucleic acid binding GO:0000166 nucleotide binding GO:0010501 RNA secondary structure unwinding GO:0003690 double-stranded DNA binding GO:0032508 DNA duplex unwinding GO:0003697 single-stranded DNA binding GO:0006406 mRNA export from nucleus GO:0009737 response to abscisic acid GO:0005730 nucleolus GO:0005618 cell wall GO:0005777 peroxisome GO:0016310 phosphorylation GO:0016301 kinase activity GO:0007623 circadian rhythm GO:0009507 chloroplast GO:0005886 plasma membrane GO:0005737 cytoplasm GO:0005634 nucleus |
|            |                             |                    | OS07G0206400               | 13 kDa prolamin C                                                           | GO:0045735 nutrient reservoir activity                                                                                                                                                                                                                                                                                                                                                                                                                                                                                                        |
|            |                             |                    | OS01G0762500               | Glutelin type-A 1                                                           | GO:0045735 nutrient reservoir activity                                                                                                                                                                                                                                                                                                                                                                                                                                                                                                        |
|            |                             |                    | OS02G0465900               | protein; Putative OsCTTP                                                    | GO:0010288 response to lead ion                                                                                                                                                                                                                                                                                                                                                                                                                                                                                                               |
|            |                             |                    | OS01G0256500               | Zinc inducible protein                                                      | GO:0006950 response to stress                                                                                                                                                                                                                                                                                                                                                                                                                                                                                                                 |
|            | 10                          | 8 hours            | OS07G0206500               | 13 kDa prolamin                                                             | GO:0045735 nutrient reservoir activity                                                                                                                                                                                                                                                                                                                                                                                                                                                                                                        |
|            |                             |                    | OS01G0762500               | Glutelin type-A 1                                                           | GO:0045735 nutrient reservoir activity                                                                                                                                                                                                                                                                                                                                                                                                                                                                                                        |
|            |                             |                    | OS10G0400200               | Glutelin type-A 2                                                           | GO:0045735 nutrient reservoir activity                                                                                                                                                                                                                                                                                                                                                                                                                                                                                                        |
|            |                             |                    | OS07G0206400               | 13 kDa prolamin C                                                           | GO:0045735 nutrient reservoir activity                                                                                                                                                                                                                                                                                                                                                                                                                                                                                                        |
|            |                             |                    | OS03G0766100               | 10 kDa prolamin                                                             | GO:0045735 nutrient reservoir activity                                                                                                                                                                                                                                                                                                                                                                                                                                                                                                        |
|            |                             |                    | OS06G0507200               | prolamin                                                                    | GO:0045735 nutrient reservoir activity                                                                                                                                                                                                                                                                                                                                                                                                                                                                                                        |
|            |                             |                    | OS11G0582400               | Embryo-specific protein                                                     | GO:0050832 defense response to fungus                                                                                                                                                                                                                                                                                                                                                                                                                                                                                                         |
|            |                             |                    | OS07G0214300               | Seed allergenic protein RAG2                                                | GO:0016068 type I hypersensitivity GO:0005615 extracellular space GO:0004867 serine-type endopeptidase inhibitor activity                                                                                                                                                                                                                                                                                                                                                                                                                     |
|            |                             |                    | OS05G0499100               | 19 kDa globulin                                                             | GO:0045735 nutrient reservoir activity                                                                                                                                                                                                                                                                                                                                                                                                                                                                                                        |
|            |                             |                    | OS02G0249600               | Glutelin type-B 2                                                           | GO:0045735 nutrient reservoir activity                                                                                                                                                                                                                                                                                                                                                                                                                                                                                                        |
|            |                             |                    | OS03G0793700               | Cupin family protein, expressed; Globulin protein                           | GO:0045735 nutrient reservoir activity                                                                                                                                                                                                                                                                                                                                                                                                                                                                                                        |
|            |                             |                    | OS02G0453600               | Glutelin                                                                    | GO:0045735 nutrient reservoir activity                                                                                                                                                                                                                                                                                                                                                                                                                                                                                                        |
|            |                             | 8 days             | OS07G0206500               | 13 kDa prolamin                                                             | GO:0045735 nutrient reservoir activity                                                                                                                                                                                                                                                                                                                                                                                                                                                                                                        |
|            |                             |                    | OS01G0762500               | Glutelin type-A 1                                                           | GO:0045735 nutrient reservoir activity                                                                                                                                                                                                                                                                                                                                                                                                                                                                                                        |
|            |                             |                    | OS10G0400200               | Glutelin type-A 2                                                           | GO:0045735 nutrient reservoir activity                                                                                                                                                                                                                                                                                                                                                                                                                                                                                                        |
|            |                             |                    | OS07G0206400               | 13 kDa prolamin C                                                           | GO:0045735 nutrient reservoir activity                                                                                                                                                                                                                                                                                                                                                                                                                                                                                                        |
|            |                             |                    | OS03G0766100               | 10 kDa prolamin                                                             | GO:0045735 nutrient reservoir activity                                                                                                                                                                                                                                                                                                                                                                                                                                                                                                        |
|            |                             |                    | OS06G0507200               | prolamin                                                                    | GO:0045735 nutrient reservoir activity                                                                                                                                                                                                                                                                                                                                                                                                                                                                                                        |
|            |                             |                    | OS07G0214300               | Seed allergenic protein RAG2                                                | GO:0016068 type I hypersensitivity GO:0005615 extracellular space GO:0004867 serine-type endopeptidase inhibitor activity                                                                                                                                                                                                                                                                                                                                                                                                                     |
|            |                             |                    | OS05G0349800               | Embryonic abundant protein 1                                                | GO:0048700 acquisition of desiccation tolerance in seed GO:0048316 seed development GO:0009737 response to abscisic acid                                                                                                                                                                                                                                                                                                                                                                                                                      |
|            |                             |                    | OS05G0499100               | 19 kDa globulin                                                             | GO:0045735 nutrient reservoir activity                                                                                                                                                                                                                                                                                                                                                                                                                                                                                                        |
|            |                             |                    | OS02G0249600               | Glutelin type-B 2                                                           | GO:0045735 nutrient reservoir activity                                                                                                                                                                                                                                                                                                                                                                                                                                                                                                        |
|            |                             |                    | OS03G0663750               |                                                                             |                                                                                                                                                                                                                                                                                                                                                                                                                                                                                                                                               |
|            |                             |                    | OS02G0453600               | Glutelin                                                                    | GO:0045735 nutrient reservoir activity                                                                                                                                                                                                                                                                                                                                                                                                                                                                                                        |
| Nondormant | 30                          | 8 hours            | OS07G0206500               | 13 kDa prolamin                                                             | GO:0045735 nutrient reservoir activity                                                                                                                                                                                                                                                                                                                                                                                                                                                                                                        |
|            |                             |                    | OS01G0762500               | Glutelin type-A 1                                                           | GO:0045735 nutrient reservoir activity                                                                                                                                                                                                                                                                                                                                                                                                                                                                                                        |
|            |                             |                    | OS10G0400200               | Glutelin type-A 2                                                           | GO:0045735 nutrient reservoir activity                                                                                                                                                                                                                                                                                                                                                                                                                                                                                                        |
|            |                             |                    | OS07G0206400               | 13 kDa prolamin C                                                           | GO:0045735 nutrient reservoir activity                                                                                                                                                                                                                                                                                                                                                                                                                                                                                                        |
|            |                             |                    | OS03G0766100               | 10 kDa prolamin                                                             | GO:0045735 nutrient reservoir activity                                                                                                                                                                                                                                                                                                                                                                                                                                                                                                        |
|            |                             |                    | OS07G0214300               | Seed allergenic protein RAG2                                                | GO:0016068 type I hypersensitivity GO:0005615 extracellular space GO:0004867 serine-type endopeptidase inhibitor activity                                                                                                                                                                                                                                                                                                                                                                                                                     |
|            |                             |                    | OS06G0507200               | prolamin                                                                    | GO:0045735 nutrient reservoir activity                                                                                                                                                                                                                                                                                                                                                                                                                                                                                                        |
|            |                             |                    | OS07G0529800               | Protein translation factor SUI1 homolog                                     | GO:0006413 translational initiation GO:0003743 translation initiation factor activity GO:0006417 regulation of translation                                                                                                                                                                                                                                                                                                                                                                                                                    |
|            |                             |                    | OS06G0681400               | Polyubiquitin                                                               | GO:0016874 ligase activity GO:0005737 cytoplasm                                                                                                                                                                                                                                                                                                                                                                                                                                                                                               |
|            |                             |                    | OS05G0499100               | 19 kDa globulin                                                             | GO:0045735 nutrient reservoir activity                                                                                                                                                                                                                                                                                                                                                                                                                                                                                                        |
|            |                             |                    | OS02G0161900               | Polyubiquitin 6                                                             | GO:0016874 ligase activity GO:0005737 cytoplasm                                                                                                                                                                                                                                                                                                                                                                                                                                                                                               |
|            |                             |                    | OS08G0104400               | uncharacterized protein                                                     | GO:0008150 biological_process GO:0003674 molecular_function                                                                                                                                                                                                                                                                                                                                                                                                                                                                                   |
|            | 10                          | 8 days             | OS07G0206500               | 13 kDa prolamin                                                             | GO:0045735 nutrient reservoir activity                                                                                                                                                                                                                                                                                                                                                                                                                                                                                                        |
|            |                             |                    | OS01G0762500               | Glutelin type-A 1                                                           | GO:0045735 nutrient reservoir activity                                                                                                                                                                                                                                                                                                                                                                                                                                                                                                        |
|            |                             |                    | OS08G0104400               | protein                                                                     | GO:0008150 biological_process GO:0003674 molecular_function                                                                                                                                                                                                                                                                                                                                                                                                                                                                                   |
|            |                             |                    | OS07G0206400               | 13 kDa prolamin C                                                           | GO:0045735 nutrient reservoir activity                                                                                                                                                                                                                                                                                                                                                                                                                                                                                                        |
|            |                             |                    | OS10G0400200               | Glutelin type-A 2                                                           | GO:0045735 nutrient reservoir activity                                                                                                                                                                                                                                                                                                                                                                                                                                                                                                        |
|            |                             |                    | OS07G0214300               | Seed allergenic protein RAG2                                                | GO:0016068 type I hypersensitivity GO:0005615 extracellular space GO:0004867 serine-type endopeptidase inhibitor activity                                                                                                                                                                                                                                                                                                                                                                                                                     |
|            |                             |                    | OS11G0582400               | Embryo-specific protein                                                     | GO:0050832 defense response to fungus                                                                                                                                                                                                                                                                                                                                                                                                                                                                                                         |
|            |                             |                    | OS03G0766100               | 10 kDa prolamin                                                             | GO:0045735 nutrient reservoir activity                                                                                                                                                                                                                                                                                                                                                                                                                                                                                                        |
|            |                             |                    | OS06G0507200               | prolamin                                                                    | GO:0045735 nutrient reservoir activity                                                                                                                                                                                                                                                                                                                                                                                                                                                                                                        |
|            |                             |                    | OS07G0529800               | Protein translation factor SUI1 homolog                                     | GO:0006413 translational initiation GO:0003743 translation initiation factor activity GO:0006417 regulation of translation                                                                                                                                                                                                                                                                                                                                                                                                                    |
|            |                             |                    | OS03G0793700               | Cupin family protein; Globulin                                              | GO:0045735 nutrient reservoir activity                                                                                                                                                                                                                                                                                                                                                                                                                                                                                                        |
|            |                             |                    | OS05G0349800               | Embryonic abundant protein 1                                                | GO:0048700 acquisition of desiccation tolerance in seed GO:0048316 seed development GO:0009737 response to abscisic acid                                                                                                                                                                                                                                                                                                                                                                                                                      |

**Supplemental Table S4.** MapMan “transcription” sub-BINs for D 8 h 30 °C vs ND 8 h 30 °C, Wilcoxon Rank Sum Test with Benjamini and Hochberg correction.

| BIN      | Name                                                                                                   | Elements | P-value   |
|----------|--------------------------------------------------------------------------------------------------------|----------|-----------|
| 27.3.24  | RNA.regulation of transcription.MADS box transcription factor family                                   | 11       | 3.149 E-4 |
| 27.3.37  | RNA.regulation of transcription.AS2,Lateral Organ Boundaries Gene Family                               | 8        | 0.002     |
| 27.3.6   | RNA.regulation of transcription.bHLH,Basic Helix-Loop-Helix family                                     | 26       | 0.016     |
| 27.3.3   | RNA.regulation of transcription.AP2/EREBP, APETALA2/Ethylene-responsive element binding protein family | 33       | 0.016     |
| 27.3.7   | RNA.regulation of transcription.C2C2 (Zn) CO-like, Constans-like zinc finger family                    | 13       | 0.084     |
| 27.3.32  | RNA.regulation of transcription.WRKY domain transcription factor family                                | 14       | 0.104     |
| 27.3.20  | RNA.regulation of transcription.G2-like transcription factor family, GARP                              | 6        | 0.110     |
| 27.3.44  | RNA.regulation of transcription.Chromatin Remodeling Factors                                           | 6        | 0.165     |
| 27.3.8   | RNA.regulation of transcription.C2C2 (Zn) DOF zinc finger family                                       | 7        | 0.173     |
| 27.3.22  | RNA.regulation of transcription.HB,Homeobox transcription factor family                                | 14       | 0.260     |
| 27.3.63  | RNA.regulation of transcription.PHD finger transcription factor                                        | 3        | 0.366     |
| 27.3.64  | RNA.regulation of transcription.PHOR1                                                                  | 2        | 0.438     |
| 27.3.40  | RNA.regulation of transcription.Aux/IAA family                                                         | 6        | 0.538     |
| 27.3.60  | RNA.regulation of transcription.NIN-like bZIP-related family                                           | 2        | 0.538     |
| 27.3.4   | RNA.regulation of transcription.ARF, Auxin Response Factor family                                      | 6        | 0.581     |
| 27.3.69  | RNA.regulation of transcription.SET-domain transcriptional regulator family                            | 4        | 0.584     |
| 27.3.17  | RNA.regulation of transcription.CPP (Zn), CPP1-related transcription factor family                     | 2        | 0.616     |
| 28.1.3   | DNA.synthesis/chromatin structure.histone                                                              | 25       | 0.632     |
| 27.3.11  | RNA.regulation of transcription.C2H2 zinc finger family                                                | 13       | 0.649     |
| 27.3.65  | RNA.regulation of transcription.Polycomb Group (PcG)                                                   | 2        | 0.649     |
| 27.3.39  | RNA.regulation of transcription.AtSR Transcription Factor family                                       | 3        | 0.649     |
| 27.3.67  | RNA.regulation of transcription.putative transcription regulator                                       | 22       | 0.649     |
| 27.3.16  | RNA.regulation of transcription.CCAAT box binding factor family, HAP5                                  | 3        | 0.764     |
| 27.3.14  | RNA.regulation of transcription.CCAAT box binding factor family, HAP2                                  | 3        | 0.764     |
| 27.3.36  | RNA.regulation of transcription.Argonaute                                                              | 1        | 0.764     |
| 27.3.5   | RNA.regulation of transcription.ARR                                                                    | 1        | 0.767     |
| 27.3.9   | RNA.regulation of transcription.C2C2 (Zn) GATA transcription factor family                             | 2        | 0.767     |
| 27.3.49  | RNA.regulation of transcription.GeBP like                                                              | 2        | 0.780     |
| 27.3.57  | RNA.regulation of transcription.JUMONJI family                                                         | 4        | 0.782     |
| 27.3.59  | RNA.regulation of transcription.Methyl binding domain proteins                                         | 1        | 0.791     |
| 27.3.30  | RNA.regulation of transcription.Trihelix, Triple-Helix transcription factor family                     | 2        | 0.799     |
| 27.3.35  | RNA.regulation of transcription.bZIP transcription factor family                                       | 11       | 0.803     |
| 27.1.20  | RNA.processing.degradation dicer                                                                       | 1        | 0.837     |
| 27.3.25  | RNA.regulation of transcription.MYB domain transcription factor family                                 | 24       | 0.864     |
| 27.3.48  | RNA.regulation of transcription.FHA transcription factor                                               | 1        | 0.866     |
| 27.3.10  | RNA.regulation of transcription.C2C2 (Zn) YABBY family                                                 | 3        | 0.906     |
| 27.3.71  | RNA.regulation of transcription.SNF7                                                                   | 2        | 0.906     |
| 27.3.47  | RNA.regulation of transcription.ELF3                                                                   | 1        | 0.910     |
| 27.3.19  | RNA.regulation of transcription.EIN3-like(EIL) transcription factor family                             | 2        | 0.910     |
| 27.3.50  | RNA.regulation of transcription.General Transcription                                                  | 3        | 0.941     |
| 27.3.1   | RNA.regulation of transcription.ABI3/VP1-related B3-domain-containing transcription factor family      | 2        | 0.941     |
| 27.3.99  | RNA.regulation of transcription.unclassified                                                           | 37       | 0.944     |
| 27.3.52  | RNA.regulation of transcription.Global transcription factor group                                      | 1        | 0.944     |
| 27.3.55  | RNA.regulation of transcription.HDA                                                                    | 3        | 0.944     |
| 27.3.23  | RNA.regulation of transcription.HSF,Heat-shock transcription factor family                             | 6        | 0.944     |
| 27.3.70  | RNA.regulation of transcription.Silencing Group                                                        | 1        | 0.944     |
| 27.3.26  | RNA.regulation of transcription.MYB-related transcription factor family                                | 4        | 0.944     |
| 27.3.27  | RNA.regulation of transcription.NAC domain transcription factor family                                 | 2        | 0.946     |
| 17.3.2.2 | hormone metabolism.brassinosteroid.signal transduction.BZR                                             | 1        | 0.950     |
| 27.3.21  | RNA.regulation of transcription.GRAS transcription factor family                                       | 3        | 0.971     |
| 27.3.51  | RNA.regulation of transcription.General Transcription, TBP-binding protein                             | 1        | 0.983     |
| 27.3.12  | RNA.regulation of transcription.C3H zinc finger family                                                 | 6        | 0.988     |

**Supplemental Table S5. Primers used in this study for qPCR.**

| Gene                                | RAP ID       | Primers sequences 5' to 3'                      |
|-------------------------------------|--------------|-------------------------------------------------|
| <i>EXPA4</i>                        | Os05g0477600 | CACTGCCAAGCTCCGCTTCAA<br>TGCTGGTGATGGTGTCTAAACG |
| <i>SAU31</i><br>(Jain et al., 2006) | Os08g0118500 | CCACCACTAGCTCGCTGTTA<br>CACAAAAATCCGAGCCGTCA    |
| <i>OPR</i>                          | Os06g0216300 | TTCGATCGAGAAGAACCAAAGC<br>CCACTTTCGCCGGTGCGTG   |
| <i>OsTOR</i>                        | Os05g0235300 | ATATCAGACGCCGTGCCATT<br>ATGAGTACCAACCTGCACCG    |
| <i>OsSAP11</i>                      | Os08g0504700 | TCCCAAAGCAAAGCGAACC<br>CGCCATGATCGAATCCGAGA     |
| <i>ABI4</i><br>(Wang et al., 2015)  | Os05g0351200 | ACCCCTGGTTCGATCTCTTC<br>AGCTGGAACGCCAAGCTAAG    |
| <i>Edf</i><br>(Wang et al., 2016)   | Os08g0366100 | TCCGAACCAGCAGATCATCG<br>GCATGGTATCAAAAGACCCAGC  |
